# Supplementary material
Source: PubMed Central journal article supplement (PMC7087454)
Supplement: NIHMS1557360-supplement-Supplementary_Figures_and_Tables.pdf [file NIHMS1557360-supplement-Supplementary_Figures_and_Tables.pdf]

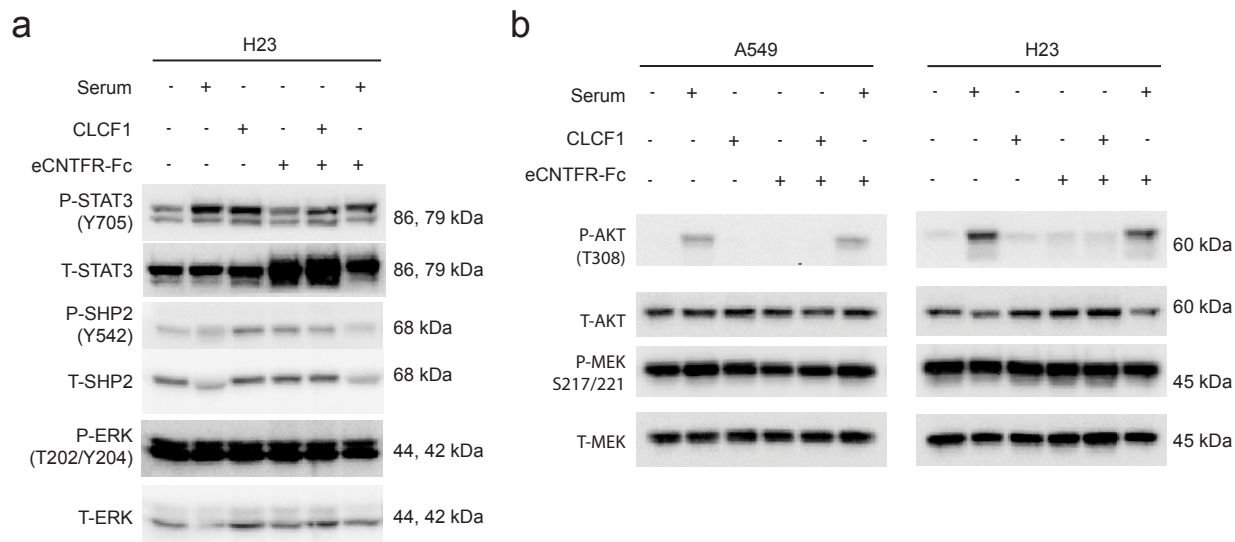

**Supplementary Figure 1:** CLCF1-CNTFR downstream signaling pathways. **(a)** Representative cropped western blot of H23 treated with serum, CLCF1, eCNTFR-Fc, CLCF1 + eCNTFR-Fc, or eCNTFR-Fc + serum after 24 h serum starvation ( $n = 2$  independent experiments with similar results). **(b)** Representative cropped western blot of A549 and H23 treated with serum, CLCF1, eCNTFR-Fc, CLCF1 + eCNTFR-Fc, or eCNTFR-Fc + serum after 24 h serum starvation ( $n = 2$  independent experiments with similar results).

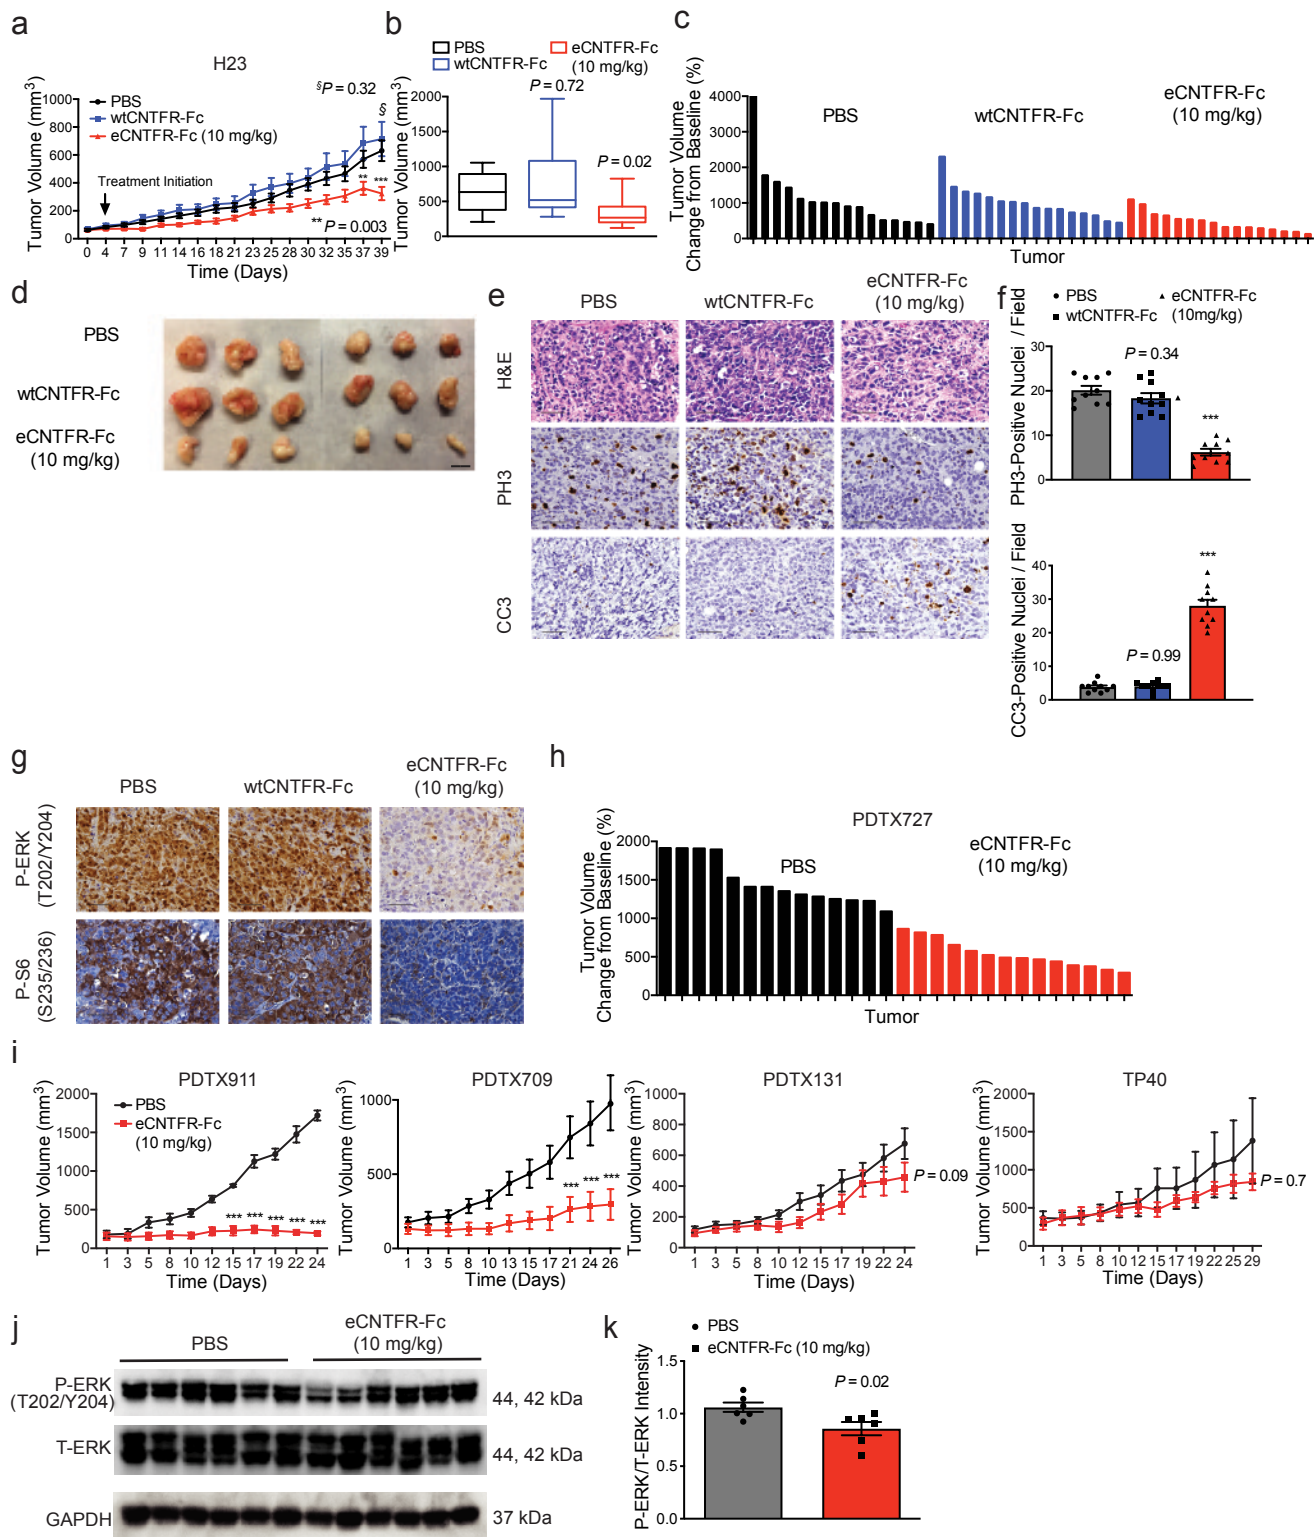

**Supplementary Figure 2:** eCNTFR-Fc decreases tumor growth in xenograft and PDX models containing a *KRAS* or *EGFR* mutation. **(a)** Tumor volume quantification of H23 xenografts ( $n = 16$  biologically independent samples). \*\*\*  $P < 0.001$  using two-way analysis of variance (ANOVA) and Dunnett's multiple comparison test (DCMT). Data represented as mean  $\pm$  S.E.M. **(b)** Tumor volume quantification of final time point of H23 xenografts. Whiskers identify the maximum and minimum values; boxes indicate the 75<sup>th</sup> and 25<sup>th</sup> percentile and the line the median. **(c)** Waterfall plot showing tumor percent change from baseline for H23 xenografts. **(d)** Representative images of H23 xenograft tumors ( $n = 16$  biologically independent samples). Scale bars, 10 mm. **(e)** Representative H&E staining and IHC for phospho-histone H3 (PH3) and cleaved caspase-3 (CC3) from H23 xenografts. Scale bars, 50  $\mu$ m. **(f)** Quantification of PH3- and CC3-positive foci ( $n = 16$  biologically independent samples with 10 technical replicates per group). \*\*\*  $P < 0.001$  using one-way ANOVA and DCMT. Data are represented as mean  $\pm$  S.E.M. **(g)** Representative IHC for phospho-ERK (P-ERK) and Phospho-S6RP (P-S6) in H23 xenografts ( $n = 3$  independent experiments with similar results). **(h)** Waterfall plot showing tumor percent change from baseline for PDX 727 model. **(i)** Tumor volume quantification of PDXs [PDX911 ( $n = 4$ ), PDX709 (PBS:  $n = 7$  and eCNTFR-Fc:  $n = 8$ ), PDX131 ( $n = 10$ ), and TP40 ( $n = 4$ ) biologically independent samples]. \*\*\*  $P < 0.001$  using one-way ANOVA and DCMT. Data represented as mean  $\pm$  S.E.M. **(j)** Representative cropped western blot of PDX727 xenografts ( $n = 2$  independent experiments with similar results). **(k)** Quantification of western blot ( $n = 2$  independent experiments with similar results). One-way ANOVA and DMCT. Data represented as mean  $\pm$  S.E.M.

# Kim and Marquez et al. Supplementary Figure 3

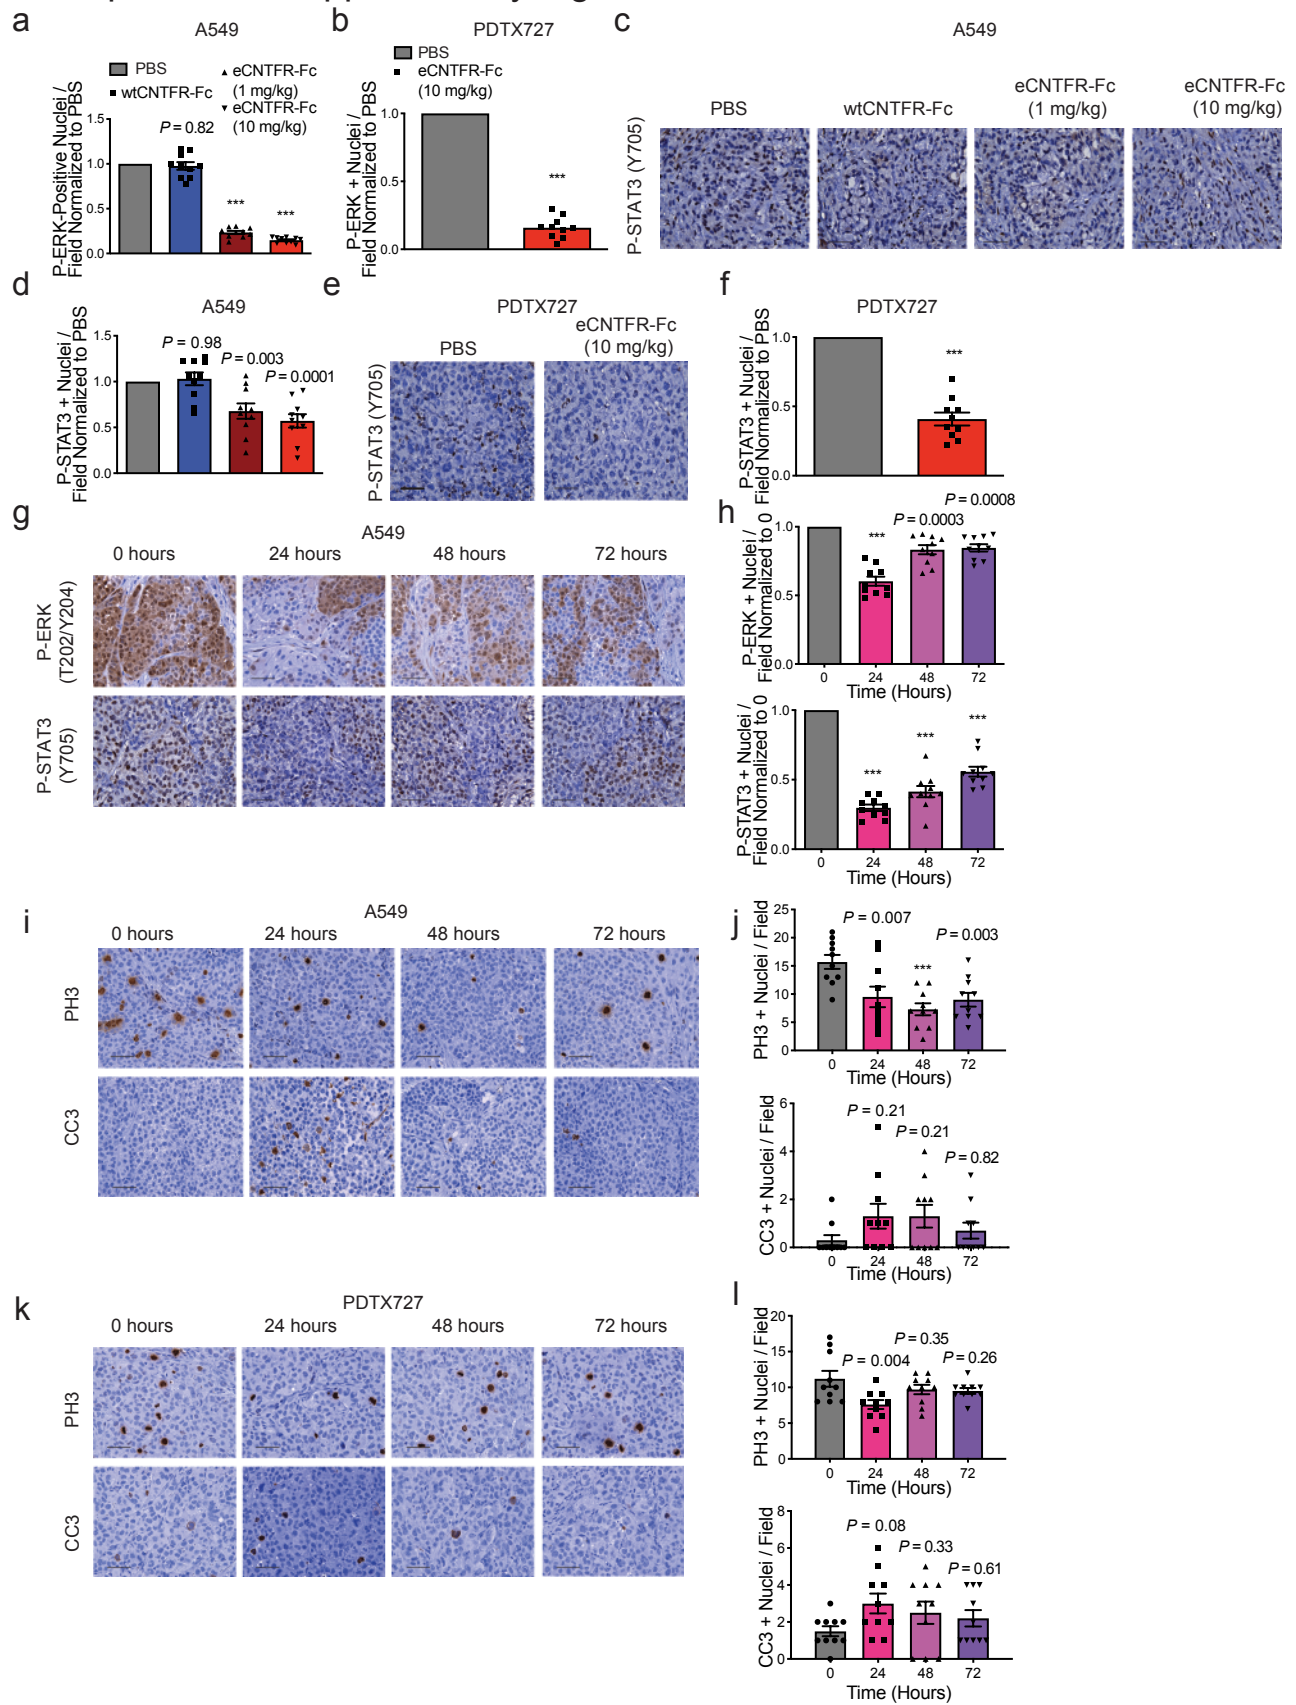



**Supplementary Figure 3:** Signaling changes mediated in a time-dependent manner by ERK and STAT3 *in vivo*. **(a)** Quantification of P-ERK data in A549 xenografts presented in **Fig. 5l** ( $n = 3$  independent experiments with 10 technical replicates per group). \*\*\*  $P < 0.001$  using one-way analysis of variance (ANOVA) and Dunnett's multiple comparison test (DMCT). Data represented as mean  $\pm$  S.E.M. **(b)** Quantification of P-ERK data in PDX727 presented in **Fig. 5m**. ( $n = 3$  independent experiments with 10 technical replicates per group). \*\*\*  $P < 0.001$  using two-tailed unpaired Student's *t*-test. Data represented as mean  $\pm$  S.E.M. **(c)** Representative IHC for phospho-STAT3 (P-STAT3). **(d)** Quantification of this P-STAT3 data in A549 xenografts ( $n = 3$  independent experiments with 10 technical replicates per group). One-way ANOVA and DMCT. Data represented as mean  $\pm$  S.E.M. **(e)** Representative IHC for P-STAT3 data in PDX727. **(f)** Quantification of P-STAT3 data ( $n = 3$  independent experiments with 10 technical replicates per group). \*\*\*  $P < 0.001$  using two-tailed unpaired Student's *t*-test. Data represented as mean  $\pm$  S.E.M. **(g)** Representative IHC for P-ERK and P-STAT3 in A549 xenografts treated with eCNTFR-Fc (10 mg/kg) and harvested at time points shown. **(h)** Quantification of P-ERK and P-STAT3 data ( $n = 2$  independent experiments with 10 technical replicates per group). \*\*\*  $P < 0.001$  using one-way ANOVA and DMCT. Data represented as mean  $\pm$  S.E.M. **(i)** Representative IHC for phospho-histone H3 (PH3) and cleaved caspase-3 (CC3) in A549 xenografts treated with eCNTFR-Fc (10 mg/kg) and harvested at time points shown. **(j)** Quantification of PH3 and CC3 data ( $n = 2$  independent experiments with 10 technical replicates per group). \*\*\*  $P < 0.001$  using one-way ANOVA and DMCT. Data represented as mean  $\pm$  S.E.M. **(k)** Representative IHC for PH3 and CC3 in PDX727 treated with eCNTFR-Fc (10 mg/kg) and harvested at time

points shown. (I) Quantification of PH3 and CC3 data ( $n = 2$  independent experiments with 10 technical replicates per group). One-way ANOVA and DMCT. Data represented as mean  $\pm$  S.E.M. Scale bars, 50  $\mu\text{m}$ .

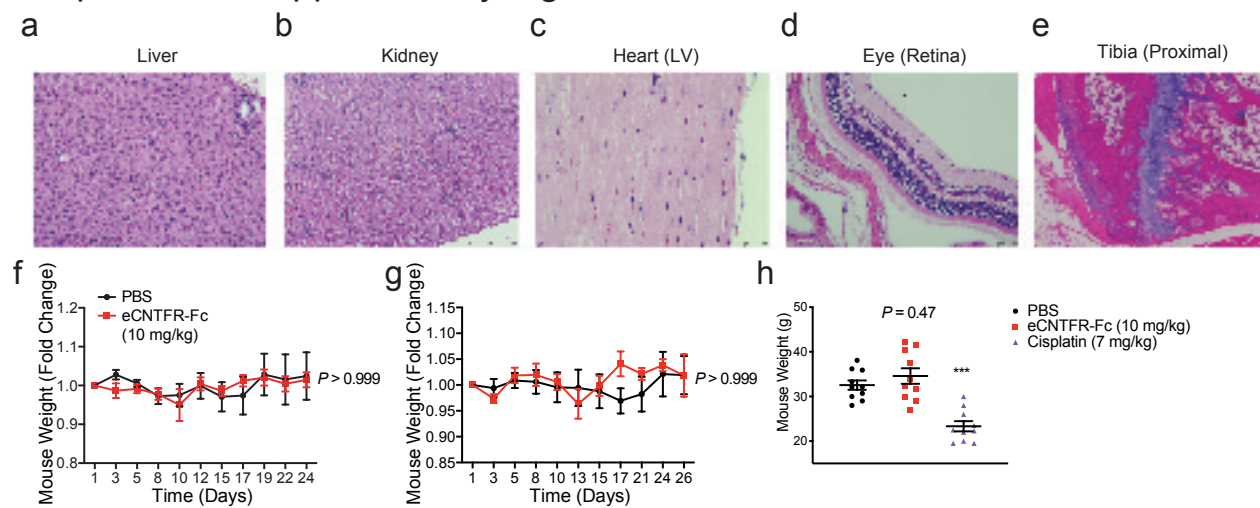

**Supplementary Figure 4:** eCNTFR-Fc produces no observable adverse effects in PDXs and GEMMs. Histologic sections and H&E staining of liver (a), kidney (b), left ventricle of the heart (c), retina (d), and proximal tibia (e) from a mouse that received the highest dose of CNTFR (10 mg/kg) for four weeks [ $n = 2$  independent experiments ( $n = 3$  mice per group) with similar results]. (f) Mouse weights following treatment course for PDX911 and PDX131 [PDX911 ( $n = 2$ ) and PDX131 ( $n = 5$ ) biologically independent samples]. (g) Mouse weights following treatment course for PDX709 ( $n = 4$  biologically independent samples). Two-way analysis of variance (ANOVA) and Dunnett's multiple comparison test (DMCT). Data represented as mean  $\pm$  S.E.M. (h) Endpoint mouse weights for *Kras*<sup>G12D</sup>/*Trp53*<sup>fl/fl</sup> mice treated 3 times per week with PBS, eCNTFR-Fc (10 mg/kg), or Cisplatin (7 mg/kg) for 4 weeks (Day 28) by intraperitoneal (i.p.) injection starting at 8 weeks post-delivery of  $5 \times 10^6$  pfu of adenovirus-expressing Cre (Ad-Cre) (Day 0) ( $n = 10$  biologically independent samples).  $*** P < 0.001$  using one-way ANOVA and DMCT. Data represented as mean  $\pm$  S.E.M.

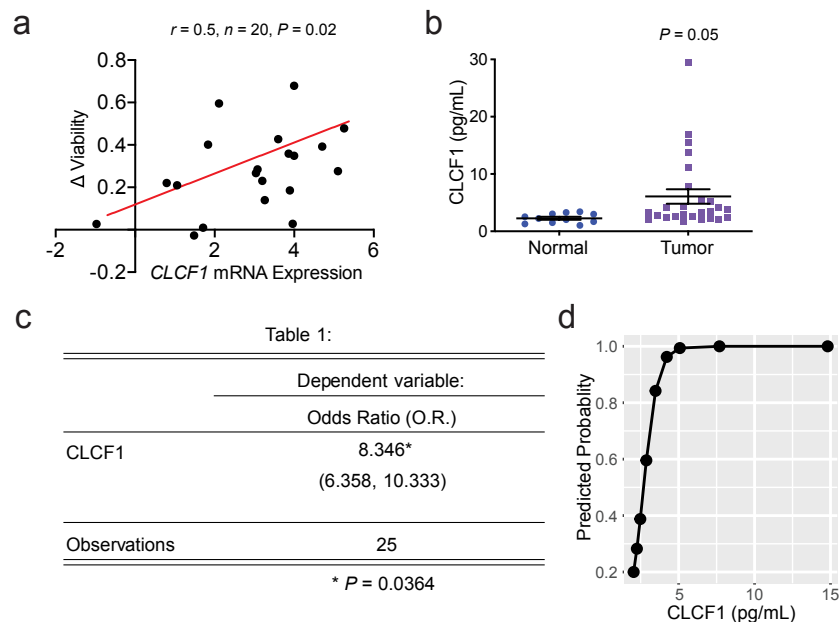

**Supplementary Figure 5:** CLCF1 as a predictive biomarker in LUAD. **(a)** Scatter plot depicting Pearson's correlation coefficient  $r$  (two-tailed) for *CLCF1* mRNA expression obtained from the Cancer Cell Line Encyclopedia (CCLE) and the change in viability after treatment with 2.5  $\mu$ M eCNTFR-Fc (in the cell line panel presented in **Figure 4a**) ( $n = 3$  independent experiments). **(b)** CLCF1 ELISA performed on patient plasma samples and normal controls [Normal ( $n = 10$ ) and Tumor ( $n = 26$ )]. **(c)** Odds ratio (O.R.) was calculated from a logistic regression (logit) model, and the  $P$ -value (two-tailed) was calculated using Wald test,  $P$ -value = 0.0364. Lung cancer samples were categorized as either having a 'mutation of interest' defined as *KRAS* G12C, *KRAS* G12V, or *KRAS* wild-type (wt) / *EGFR* mutant (dummy coded as 1,  $n = 17$ ) or *KRAS* wt (dummy coded as 0,  $n = 8$ ). **(d)** Graph showing the predictive probability of being in the mutation group as a function of blood plasma CLCF1 (pg/mL): y-axis is the predicted probability and the x-axis is the blood plasma CLCF1 (pg/mL).

Kim and Marquez et al. Supplementary Table 1

| Sample              | Mutation Status     | Staging Information                                                         | Induction                 | Pathology                                                                                                     | Age | Sex | Race  |
|---------------------|---------------------|-----------------------------------------------------------------------------|---------------------------|---------------------------------------------------------------------------------------------------------------|-----|-----|-------|
| CAF/NF1<br>HT141107 | EGFR Exon 19        | IA (T1bN0)                                                                  | n/a                       | adenocarcinoma, 90% acinar focal lepidic, ALK/ROS1-, EGFR+exon19                                              | 55  | F   | white |
| CAF/NF2<br>HT141208 | TP53 and BRAF G466V | n/a                                                                         | n/a                       | n/a                                                                                                           | n/a | n/a | n/a   |
| CAF/NF3<br>HT141218 | TP53                | T1aN0                                                                       | n/a                       | adenocarcinoma, CK7/TTF1/NapsinA+, p63 CK5/6-, CK20-, ALK/ROS1-                                               | 79  | M   | asian |
| CAF/NF4<br>HT151120 | None                | mucinous adenocarcinoma                                                     | breast chemo 2010-present | adenocarcinoma w/ mucinous features, EGFR/KRAS/ALK/ROS1-, TTF1/napsin-                                        | 64  | F   | other |
| CAF/NF5<br>HT151203 | EGFR Exon 19        | IIA NSCLC, stage T2a N1M0                                                   | n/a                       | adenocarcinoma TTF1+, napsin+, GATA-, micropapillary                                                          | 65  | F   | other |
| CAF/NF6<br>HT151210 | n/a                 | T2aN2                                                                       | n/a                       | CK7/TTF-1/napsin +, p63/CK5&6 -, adenocarcinoma 50% acinar, 30% papillary 20% micropapillary                  | 76  | M   | asian |
| CAF/NF7<br>HT160120 | TP53                | T1BN0 (stage IA) adenoCA                                                    | n/a                       | adenocarcinoma, CK7+, TTF1+, CK20-, napsinA+, GATA3-, acinar70%, lepidic 20%, micropapillary 5%, papillary 5% | 79  | F   | white |
| CAF/NF8<br>HT160216 | KRAS G12C, TP53     | (T2a N0)IB non-small cell lung cancer, poorly differentiated adenocarcinoma | n/a                       | adenocarcinoma, solid 90%, acinar 10%                                                                         | 76  | F   | white |

**Supplementary Table 1:** Detailed patient information from samples collected for the cancer-associated fibroblast (CAF) and normal lung fibroblast (NLF) pairs.



| Gene Name      | Primer Sequence        |
|----------------|------------------------|
|                | 5' - SEQUENCE - 3'     |
| <b>HPRT</b>    |                        |
| Forward        | TGACACTGGTAAAACAATGCA  |
| Reverse        | GGTCCTTTTCACCAGCAAGCT  |
| <b>GAPDH</b>   |                        |
| Forward        | ACACCATGTATTCCGGGTCAAT |
| Reverse        | TGTGGGCATCAATGGATTTGG  |
| <b>CNTRF_1</b> |                        |
| Forward        | ACAAGGTCTCCATAAGTGCA   |
| Reverse        | TTCTGGAGGATCAGGCTTCA   |
| <b>CNTRF_2</b> |                        |
| Forward        | CCTGCTGTGCTGTGCTTG     |
| Reverse        | AACATCCCCCAGAGTCC      |
| <b>CLCF1_1</b> |                        |
| Forward        | CCAGAAAACCTATGACCTCAC  |
| Reverse        | TGAAGTCTGGCTCGTTGAAA   |
| <b>CLCF1_2</b> |                        |
| Forward        | TGGCGGATGGGATTATTAAA   |
| Reverse        | CGCTCGTACTGCACATGG     |

**Supplementary Table 2:** Primer sequences used for *CLCF1* and *CNTRF* used for quantitative real-time PCR (qRT-PCR).

a

|    |   | Residue no. |    |    |     |     |     |     |     |     |     |     |     |     |     |     |     |     |     |     |     |     |     |     |     |     |     |     |     |     |     |     |     |   |  |
|----|---|-------------|----|----|-----|-----|-----|-----|-----|-----|-----|-----|-----|-----|-----|-----|-----|-----|-----|-----|-----|-----|-----|-----|-----|-----|-----|-----|-----|-----|-----|-----|-----|---|--|
|    |   | 36          | 61 | 88 | 107 | 132 | 140 | 144 | 146 | 163 | 166 | 168 | 169 | 174 | 184 | 189 | 189 | 190 | 201 | 220 | 224 | 235 | 237 | 243 | 250 | 255 | 258 | 271 | 283 | 287 | 304 | 308 | 333 |   |  |
| WT |   | E           | G  | A  | L   | P   | T   | T   | L   | R   | I   | T   | M   | T   | S   | H   | H   | N   | I   | R   | V   | P   | S   | F   | I   | Q   | E   | Y   | K   | I   | E   | H   | K   |   |  |
| 1  |   |             |    | S  |     | S   |     |     |     |     |     |     |     |     |     |     |     |     |     |     |     |     |     |     |     |     |     |     |     |     |     |     |     |   |  |
| 2  |   |             |    |    |     |     |     |     |     |     |     |     |     |     |     |     |     |     |     |     |     |     |     |     |     |     |     |     |     |     |     |     |     |   |  |
| 3  |   |             |    |    |     |     |     |     |     |     | S   |     |     | P   |     |     |     |     |     |     |     |     |     |     |     | L   |     |     |     |     |     |     |     |   |  |
| 4  |   |             |    |    |     |     |     |     |     | S   |     |     |     | P   |     |     |     |     |     |     |     |     |     |     |     | L   |     |     |     |     |     |     |     |   |  |
| 5  |   |             |    |    |     |     |     |     |     |     |     |     | P   |     |     | R   |     |     |     |     |     |     |     | V   |     | G   | C   |     |     |     |     |     |     | R |  |
| 6  |   |             |    |    |     |     |     |     |     |     |     |     |     |     | C   |     |     |     |     |     |     |     |     |     |     |     |     |     |     |     |     |     |     |   |  |
| 7  |   | G           |    |    |     |     |     |     |     |     | C   |     |     |     |     |     |     |     |     |     |     | A   |     |     |     |     |     |     |     |     |     |     |     |   |  |
| 8  |   |             |    |    |     |     |     |     |     |     |     | T   |     | G   |     |     |     |     | S   |     |     |     |     |     |     |     |     |     |     |     |     |     |     |   |  |
| 9  |   |             |    |    |     |     |     |     | V   |     |     |     |     |     |     |     |     |     |     |     |     |     |     | S   |     |     |     |     | M   |     |     |     |     |   |  |
| 10 |   |             |    |    |     |     |     |     |     |     |     |     |     |     |     |     |     |     |     |     |     |     |     | F   |     |     |     |     |     |     |     |     |     |   |  |
| 11 |   |             |    | L  |     |     |     | Q   |     |     |     |     |     |     |     |     |     |     |     |     |     |     |     |     |     |     |     |     |     |     | F   |     |     |   |  |
| 12 | V |             | T  |    |     |     |     |     |     |     |     |     |     |     |     |     |     |     |     |     |     |     | L   |     |     |     |     |     |     |     | F   |     |     |   |  |
| 13 |   |             |    |    |     |     |     |     |     |     |     |     |     |     |     |     |     |     |     |     |     |     |     |     |     |     |     |     |     |     |     | F   |     | R |  |
| 14 |   |             |    |    |     |     |     |     |     |     |     |     |     | P   |     | N   |     | D   | V   |     |     |     |     |     |     |     |     |     |     |     |     |     |     | G |  |
| 15 |   |             |    |    |     |     |     |     |     |     |     |     |     | P   |     |     |     |     |     |     |     |     |     |     |     |     |     |     |     |     |     |     |     |   |  |
| 16 |   |             |    |    |     |     |     |     |     |     |     |     |     | P   |     |     | R   |     |     |     |     |     |     |     | V   |     | G   | C   |     |     | F   |     |     | R |  |
| 17 |   |             |    |    |     |     | S   |     |     |     |     |     |     |     |     |     |     |     |     |     |     |     |     |     |     |     |     |     |     |     |     | F   |     |   |  |
| 18 |   |             |    |    |     |     |     |     |     |     |     |     |     | P   |     |     |     |     |     |     |     |     |     |     |     |     |     |     |     |     |     |     | G   |   |  |

b

|    |   | Residue no. |    |    |    |    |     |     |     |     |     |     |     |     |     |     |     |     |     |     |     |     |
|----|---|-------------|----|----|----|----|-----|-----|-----|-----|-----|-----|-----|-----|-----|-----|-----|-----|-----|-----|-----|-----|
|    |   | 59          | 63 | 69 | 75 | 94 | 110 | 156 | 167 | 191 | 228 | 235 | 237 | 243 | 266 | 287 | 289 | 304 | 311 | 317 | 323 | 333 |
| WT |   | V           | D  | L  | V  | S  | R   | K   | R   | A   | T   | P   | S   | F   | T   | I   | T   | E   | T   | E   | T   | K   |
| 1  |   |             |    |    |    |    |     |     |     | E   |     |     | F   |     |     |     |     |     |     |     |     |     |
| 2  |   |             |    |    |    |    |     |     |     |     |     |     | F   |     |     |     |     |     |     |     |     |     |
| 3  |   |             | F  |    | N  | Q  |     |     |     |     |     |     | F   |     |     |     |     |     |     |     |     |     |
| 4  |   |             |    | A  |    |    |     |     |     |     |     |     | Y   |     |     | A   |     |     |     |     |     |     |
| 5  |   |             |    |    |    |    |     |     |     |     |     |     | F   |     |     |     |     |     |     |     |     |     |
| 6  |   |             |    |    |    |    |     |     |     |     |     |     | F   |     |     |     |     |     |     |     |     |     |
| 7  |   | N           |    |    |    |    |     |     |     | A   |     |     | F   | L   |     |     |     |     |     |     |     |     |
| 8  |   |             |    |    |    |    |     |     |     |     |     |     | F   |     |     |     |     |     |     |     |     |     |
| 9  |   |             |    |    |    |    |     |     |     |     |     |     | F   |     |     |     |     |     |     |     |     |     |
| 10 |   |             | F  |    | N  | Q  |     |     |     |     |     |     | F   |     |     |     |     |     |     |     |     |     |
| 11 | L |             |    |    |    |    |     |     |     |     |     |     | F   |     |     |     |     |     |     | G   |     |     |
| 12 |   |             |    |    |    |    |     |     |     |     |     |     | F   |     |     |     |     |     | A   |     |     |     |
| 13 |   |             |    |    |    |    |     |     |     |     |     |     | F   |     |     |     |     |     |     |     |     | M   |
| 14 |   |             |    |    |    |    |     |     |     |     |     |     | F   |     | A   |     |     |     |     |     |     |     |
| 15 |   |             |    |    |    |    |     | H   |     |     | S   |     | F   |     |     | F   |     |     |     |     |     |     |
| 16 |   |             |    |    |    |    |     |     |     |     |     |     | F   |     |     |     |     |     |     |     |     |     |
| 17 |   |             |    |    |    |    |     | H   |     |     | S   |     | F   |     |     | F   |     |     |     |     |     |     |
| 18 |   |             |    |    |    |    | E   |     |     |     |     |     | F   |     |     |     |     | G   |     |     | A   |     |

**Supplementary Table 3:** Sequence of CNTFR variants isolated from sort 3 (a) and sort 4 (b) of Library 1 (error-prone CNTFR library). Eighteen clones were sequenced at random from CNTFR variants recovered from sort 3 and sort 4. Note the emergence of T274P in sort 3 and S237F in sort 4 consensus mutations.



Kim and Marquez et al. Supplementary Table 5

| PDTX    | ID    | Gender | Age | Ethnicity | Smoking                    | KRAS | TP53 | LKB1 | CDKN2A | KEAP1 | ALK | EGFR  | Histology      | Staging    |
|---------|-------|--------|-----|-----------|----------------------------|------|------|------|--------|-------|-----|-------|----------------|------------|
| PDTX131 | 30131 | F      | 80  | White     | yes (Former; 17-pack year) | N    | Y    | N    | N      | N     | N   | N     | Squamous       | T2a N0 MX  |
| PDTX727 | 20727 | M      | 67  | White     | yes (Former; 51-pack year) | G12V | Y    | N    | N      | Y     | N   | N     | Adenocarcinoma | T2a N2 MX  |
| PDTX911 | 30911 | M      | 80  | White     | yes (Former; 40-pack year) | G12C | Y    | N    | Y      | Y     | N   | N     | Adenocarcinoma | T2b N0 M1b |
| BM002   | 50709 | M      | 73  | Asian     | n/a                        | N    | Y    | N    | Y      | N     | N   | L813R | Adenocarcinoma | brain met  |
| TP40    | TP40  | n/a    | n/a | n/a       | n/a                        | N    | Y    | N    | Y      | N     | Y   | N     | Adenocarcinoma | T2a N2 M0  |

**Supplementary Table 5:** Detailed patient information corresponding to patient-derived tumor xenografts (PDTXs).

Kim and Marquez et al. Supplementary Table 6

| <b>Hematological</b>   | eCNTFR-Fc  |            |              |              | Reference Range | Units      |
|------------------------|------------|------------|--------------|--------------|-----------------|------------|
|                        | PBS        | wtCNTFR-Fc | 1 mg/kg      | 10 mg/kg     |                 |            |
| WBC                    | 7.14 ± 0.3 | 6.81 ± 0   | 5.85 ± 0.2   | 6.23 ± 0.4   | 5.5 – 9.3       | K/ $\mu$ l |
| RBC                    | 7.32 ± 0.8 | 7.65 ± 0.3 | 7.61 ± 1.2   | 6.52 ± 1.3   | 7.0 – 8.8       | M/ $\mu$ l |
| HGB                    | 13 ± 0.3   | 13.3 ± 1.2 | 13.3 ± 0.7   | 13.7 ± 1.9   | 13.7 – 16.4     | gm/dL      |
| HCT                    | 38.5 ± 2.0 | 40.3 ± 0.9 | 44.9 ± 1.4   | 39.3 ± 5.0   | 39.0 – 47.0     | %          |
| Platelet (estimate)    | Adequate   | Adequate   | Adequate     | Adequate     | Adequate        |            |
| <b>Chemistry Panel</b> |            |            |              |              |                 |            |
| Glucose                | 212 ± 10.7 | 224 ± 12.3 | 200 ± 1.9    | 227 ± 25.3   | 184 – 220       | mg/dL      |
| Cholesterol            | 111 ± 11.5 | 116 ± 2.3  | 85 ± 22.0    | 114.3 ± 25.8 | N/A             | mg/dL      |
| Calcium                | 10.5 ± 1.5 | 10.4 ± 0.4 | 9.7 ± 0.1    | 10.8 ± 0.9   | 8.9 – 9.7       | mg/dL      |
| Phosphorus             | 8.7 ± 0.5  | 7.2 ± 1.0  | 7.2 ± 0.7    | 9.2 ± 2.7    | N/A             | mg/dL      |
| Sodium                 | 155 ± 0.3  | 155 ± 1.1  | 153 ± 4.5    | 155.5 ± 3.1  | 114 – 154       | mmol/L     |
| Potassium              | 8.4 ± 0.4  | 8.7 ± 0.3  | 7.7 ± 0.9    | 9.9 ± 2.3    | 3.0 – 9.6       | mmol/L     |
| Chloride               | 115 ± 2.8  | 115 ± 1.6  | 114 ± 2.8    | 112.5 ± 3.9  | N/A             | mmol/L     |
| Carbon Dioxide         | 26 ± 1.2   | 24.6 ± 0.6 | 23.3 ± 0.8   | 23.2 ± 1.4   | N/A             | mmol/L     |
| Anion Gap              | 22.4 ± 1.6 | 24.1 ± 2.1 | 24.4 ± 3.9   | 29.7 ± 4.8   | N/A             | mmol/L     |
| <b>Hepatic</b>         |            |            |              |              |                 |            |
| AST                    | 88 ± 21.2  | 117 ± 15.2 | 133.5 ± 18.9 | 151 ± 28.6   | 192 – 388       | U/L        |
| ALT                    | 48 ± 15.1  | 45 ± 11.2  | 61 ± 17.8    | 64.8 ± 25.0  | 76 – 160        | U/L        |
| Alkaline Phosphatase   | 50 ± 26.4  | 56 ± 18.4  | 91 ± 22.5    | 52.6 ± 35.8  | 171 – 183       | IU/L       |
| GGT                    | 0          | 0          | 0            | 0            | N/A             | U/L        |
| Bilirubin (total)      | 0.3 ± 0    | 0.3 ± 0.1  | 0.2 ± 0      | 0.4 ± 0      | N/A             | mg/dL      |
| Protein (total)        | 5.1 ± 0.1  | 5.2 ± 0.5  | 5.5 ± 0.2    | 5.5 ± 0.1    | 5.0 – 6.2       | g/dL       |
| Albumin                | 2.8 ± 0.2  | 2.4 ± 0.1  | 3 ± 0.4      | 2.9 ± 0      | 3.2 – 3.6       | g/dL       |
| Globulin               | 2.3 ± 0.3  | 2.4 ± 0.1  | 2.5 ± 0.2    | 2.5 ± 0.1    | N/A             |            |
| <b>Renal</b>           |            |            |              |              |                 |            |
| BUN                    | 22 ± 2.5   | 19 ± 1.7   | 15 ± 4.8     | 18.3 ± 3.2   | 20.3 – 24.7     | mg/dL      |
| Creatinine             | 0.2 ± 0.1  | 0.2 ± 0.1  | 0.1 ± 0      | 0.2 ± 0      | 0.1 – 1.1       | mg/dL      |

**Supplementary Table 6:** Toxicology studies examining complete blood counts and chemistry panels for mice treated with PBS, wtCNTFR-Fc, eCNTFR-Fc (1 mg/kg), and eCNTFR-Fc (10 mg/kg) ( $n = 3$  per group). Error shows the range of values.



Kim and Marquez et al. Supplementary Table 7

| Sample | Mutation Status  | Staging Information                                                         | Induction                                                                | Pathology                                                                                                                                                                                                                                                                                                                                                              | Age | Sex | Race  |
|--------|------------------|-----------------------------------------------------------------------------|--------------------------------------------------------------------------|------------------------------------------------------------------------------------------------------------------------------------------------------------------------------------------------------------------------------------------------------------------------------------------------------------------------------------------------------------------------|-----|-----|-------|
| 1      | KRAS G13C, TP53  | T2aNO Adenocarcinoma                                                        | None                                                                     | MODERATELY DIFFERENTIATED INVASIVE ADENOCARCINOMA, PAPILLARY PREDOMINANT papillary (50%), lepidic (40%) and acinar (10%)                                                                                                                                                                                                                                               | 81  | F   | white |
| 2      | EGFR Exon 19 PLS | T2aN1 Adenocarcinoma                                                        | n/a                                                                      | Moderately differentiated, predominantly invasive with less than 10% lepidic                                                                                                                                                                                                                                                                                           | 64  | F   | Asian |
| 3      | TP53             | T1b Adenocarcinoma                                                          | marginal zone lymphoma that was treated with chemoradiation in the past. | 90% solid, 10% lepidic, poorly differentiated                                                                                                                                                                                                                                                                                                                          | 72  | M   | White |
| 4      | KRAS G12C, TP53  | T2a NX Adenocarcinoma                                                       | n/a                                                                      | invasive adenocarcinoma with papillary (70%), lepidic (15%) and acinar (15%) features                                                                                                                                                                                                                                                                                  | 76  | M   | white |
| 5      | n/a              | T1a                                                                         | n/a                                                                      | LYMPHOEPITHELIOMA-LIKE CARCINOMA poorly differentiated, positive for CK5/6, as well as EBV RNA by in situ hybridization. CD5 highlights T lymphocytes within the lymphocytic infiltrates.                                                                                                                                                                              | 76  | M   | asian |
| 6      | MET exon 14      | T2a minimally invasive adenocarcinoma                                       | n/a                                                                      | well differentiated invasive adenocarcinoma with acinar (60%) and lepidic (40%) growth patterns. An EVG stain shows focal invasion of the visceral pleura (PL2)                                                                                                                                                                                                        | 66  | M   | white |
| 7      | EGFR Exon 19     | IIA NSCLC, stage T2a N1M0                                                   | n/a                                                                      | adenocarcinoma TTF1+, napsin+, GATA-, micropapillary                                                                                                                                                                                                                                                                                                                   | 65  | F   | other |
| 8      | EGFR L861Q       | T2aN2 adeno                                                                 | n/a                                                                      | MODERATELY DIFFERENTIATED INVASIVE ADENOCARCINOMA, (50% ACINAR, 30% PAPILLARY, 20% MICROPAPILLARY) There is infiltration through the elastic layer of the visceral pleura with involvement of the surface of the visceral pleura, confirmed by immunohistochemical stains (positive for MOC 31 and BerEp4; negative for calretinin and D2-40). This corresponds to PL2 | 75  | M   | asian |
| 9      | TP53             | T1bN0 (stage IA) adenoCA                                                    | n/a                                                                      | adenocarcinoma, CK7+, TTF1+, CK20-, napsinA+, GATA3-, acinar70%, lepidic 20%, micropapillary 5%, papillary 5%                                                                                                                                                                                                                                                          | 79  | F   | white |
| 10     | KRAS G12C, TP53  | (T2a N0)IB non-small cell lung cancer, poorly differentiated adenocarcinoma | n/a                                                                      | adenocarcinoma, solid 90%, acinar 10%                                                                                                                                                                                                                                                                                                                                  | 76  | F   | white |
| 11     | KRAS G12C        | T1c N2 adeno                                                                | n/a                                                                      | Adenocarcinoma (60% acinar, 40% solid), strongly CK7-positive and focally positive for napsin and TTF-1                                                                                                                                                                                                                                                                | 82  | F   | white |
| 12     | n/a              | T2aNx adeno                                                                 | n/a                                                                      | ADENOCARCINOMA, POORLY DIFFERENTIATED, Immunohistochemistry is positive for CK7 with focal p63 and CK5/6, 95% solid, 5% acinar)                                                                                                                                                                                                                                        | 84  | M   | white |
| 13     | n/a              | T1bN0                                                                       | history of bilateral, on 2.5mg of letrozole daily breast cancer          | The histological sections of the right upper lobe (Part B) demonstrate an adenocarcinoma with mixed morphological patterns including lepidic and acinar, with focal clear cells. The acinar pattern is predominant with approximately 60%, while the lepidic pattern is 30% and the clear cell component is 10%.                                                       | 74  | F   | white |

**Supplementary Table 7:** Detailed patient information for plasma samples collected for CLCF1 ELISA.

Kim and Marquez et al. Supplementary Table 8

| Sample | Mutation Status        | Staging Information                               | Induction | Pathology                                                                                                                                                                                                                                                                                                                                                                                                                                                                     | Age | Sex | Race            |
|--------|------------------------|---------------------------------------------------|-----------|-------------------------------------------------------------------------------------------------------------------------------------------------------------------------------------------------------------------------------------------------------------------------------------------------------------------------------------------------------------------------------------------------------------------------------------------------------------------------------|-----|-----|-----------------|
| 14     | KRAS G12A, TP53        | T1a adeno                                         | n/a       | well-differentiated invasive adenocarcinoma with predominantly acinar type (95%) histology with a minority lepidic pattern (5%)                                                                                                                                                                                                                                                                                                                                               | 73  | F   | white           |
| 15     | KRAS G12V              | T4 N2 adeno                                       | n/a       | well-differentiated invasive adenocarcinoma with predominantly papillary type (70%) morphology and minor components of lepidic (15%), solid with mucin production (10%), and acinar (5%) growth patterns. In many areas, the neoplastic cells show goblet cell-like mucinous differentiation. Immunohistochemical stains show focal TTF-1 nuclear positivity and focal Napsin A granular cytoplasmic positivity                                                               | 78  | M   | white           |
| 16     | KRAS G12C              | T1b Adenocarcinoma                                | n/a       | The tumor cells have abundant, pale, eosinophilic cytoplasm with distinct cell borders and display acinar (90%) and solid (10%) growth patterns. Immunostains demonstrate that the tumor cells are positive for napsin and positive for nuclear TTF-1                                                                                                                                                                                                                         | 68  | M   | white           |
| 17     | n/a                    | T1a carcinoid                                     | n/a       | TYPICAL CARCINOID TUMOR (WELL DIFFERENTIATED NEUROENDOCRINE TUMOR), 1.1CM                                                                                                                                                                                                                                                                                                                                                                                                     | 52  | F   | white           |
| 18     | EGFR L858R             | T1b Adenocarcinoma                                | n/a       | The vast majority of the tumor is invasive with a minor component, about 5%, of lepidic pattern.                                                                                                                                                                                                                                                                                                                                                                              | 71  | F   | white           |
| 19     | EGFR G752A, TP53       | T1b Adenocarcinoma                                | n/a       | moderately differentiated invasive adenocarcinoma, with a predominantly papillary architecture (50%). Acinar (20%), solid (20%) and micropapillary (10%) patterns are also present.                                                                                                                                                                                                                                                                                           | 58  | M   | white           |
| 20     | KRAS G12V, TP53        | T2a                                               | n/a       | multilobular moderately differentiated invasive adenocarcinoma with predominantly solid (90%) and acinar (10%) patterns                                                                                                                                                                                                                                                                                                                                                       | 79  | F   | asian           |
| 21     | KRAS G12C              | T1b Adenocarcinoma                                | n/a       | approximately 80% acinar pattern with small (approximately 20%) portions of lepidic pattern at the lesion periphery. Malignant cells are moderately differentiated, with high nuclear to cytoplasmic ratios, prominent nucleoli and coarse chromatin. Bronchovascular margins are negative.                                                                                                                                                                                   | 77  | F   | white           |
| 22     | EGFR G719A, TP53       | T1b N2 Adenocarcinoma                             | n/a       | invasive poorly differentiated adenocarcinoma measuring 2.0 cm. The majority (90%) of the adenocarcinoma shows a acinar pattern of growth and displays mucinous differentiation. About 5% of the tumor shows a lepidic growth pattern and about 5% shows a micropapillary pattern of growth.                                                                                                                                                                                  | 63  | F   | white           |
| 23     | TP53, EGFR L858R, AKT1 | T3N0 adenosquamous                                | n/a       | demonstrates a lung tumor with histological features of adenocarcinoma and squamous carcinoma. The adenocarcinoma component is positive for TTF1, positive for CK 7, focally positive for CK 20, weakly positive for Napsin A, negative for p63, and negative for CK 5/6 by immunohistochemical stain. Meanwhile, the squamous component is positive for p63, positive for CK5/6, weakly positive for CK 7, negative for TTF1, negative for CK 20, and negative for Napsin A. | 77  | M   | asian           |
| 24     | EGFR 20 insertion      | T3 (2.9 cm, 0.4 cm, 0.3 cm, 0.3 cm nodules) adeno | n/a       | A main mass measuring 2.9 cm as well as three separate tumor nodules measuring from 0.3 cm to 0.4 cm in greatest dimension are seen in the same lobe. CK7 and CD163 immunohistochemical stain performed on the main tumor and the satellite nodules (block F2) fail to reveal any evidence of connection of the main tumor to the satellite nodules.                                                                                                                          | 64  | F   | Native Hawaiian |
| 25     | APC                    | T2a                                               | n/a       | moderately-differentiated adenocarcinoma. The tumor cells are positive for CK7, TTF-1, and napsin A. CK5/6 and p63 immunohistochemical stains are negative for the tumor cells.                                                                                                                                                                                                                                                                                               | 76  | M   | other           |
| 26     | n/a                    | T2a                                               | n/a       | invasive poorly-differentiated adenocarcinoma that includes numerous individual cells with atypical features and some cells with signet-ring like features. Elastic Van Gieson stained sections demonstrate extension of the tumor to the visceral surface, which places the tumor within the PL2 and T2 staging categories                                                                                                                                                   | 86  | M   | white           |

**Supplementary Table 8:** Detailed patient information for plasma samples collected for CLCF1 ELISA.
